# Supplementary material for: Predicting maintenance lithium response for bipolar disorder from electronic health records—a retrospective study
Source: PeerJ journal article supplement (doi:10.7717/peerj.17841), 2024-10-14

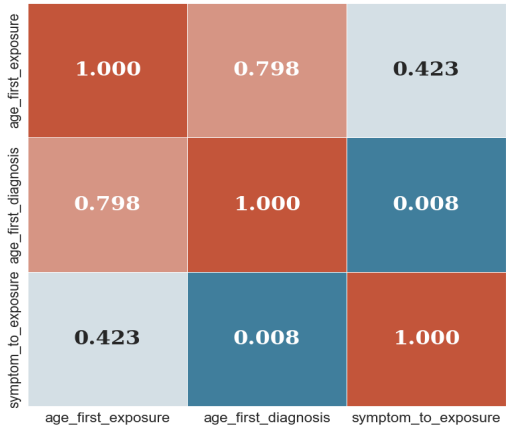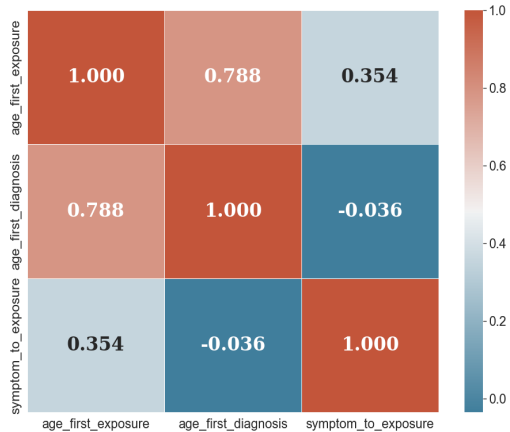

Supplement: eFig1.pdf [file eFig1.pdf]
