# Supplementary material for: Predicting maintenance lithium response for bipolar disorder from electronic health records—a retrospective study
Source: PeerJ journal article supplement (doi:10.7717/peerj.17841), 2024-10-14
Supplement: eTable1.pdf [file eTable1.pdf]

---

| NAME                | DESCRIPTION                                                                                                                      |
|---------------------|----------------------------------------------------------------------------------------------------------------------------------|
| adhd                | ADHD: 1= present, 0= absent before exposure                                                                                      |
| adhd_date           | date of adhd diagnosis                                                                                                           |
| age_first_diagnosis | Age at first recorded diagnosis                                                                                                  |
| age_first_exposure  | Age at exposure start                                                                                                            |
| alcohol             | alcohol problem: 1= present, 0= absent before exposure                                                                           |
| alcohol_date        | date of first recorded alcohol problem                                                                                           |
| anxiety             | anxiety disorder: 1= present, 0= absent before exposure                                                                          |
| anxiety_date        | date of first recorded anxiety problem                                                                                           |
| asthma              | asthma diagnosis                                                                                                                 |
| asthma_date         | asthma: 1= present, 0= absent before exposure                                                                                    |
| BMI                 | Body mass index prior to exposure                                                                                                |
| BMI_date            | date of body mass index measure                                                                                                  |
| BP_date             | date of blood pressure measure prior to exposure                                                                                 |
| ca                  | calcium blood test (before exposure start) (mmol/L)                                                                              |
| ca_date             | date of calcium blood test                                                                                                       |
| cannabis            | cannabis use before exposure start, 1= present, 0= absent                                                                        |
| cannabis_date       | date of first recorded cannabis use                                                                                              |
| CHD                 | coronary heart disease diagnosis before exposure start<br>(including angina, MI, heart failure)                                  |
| CHD_date            | date of coronary heart disease diagnosis: 1= present, 0= absent                                                                  |
| CKD3                | chronic kidney disease stage 3 or more severe (eGFR<60)                                                                          |
| cohort_end          | potential end date for follow-up for individual patient                                                                          |
| cohort_start        | potential start date for follow-up for individual patient                                                                        |
| conduct             | conduct disorder diagnosis: 1= present, 2= absent                                                                                |
| conduct_date        | date of first recorded conduct disorder diagnosis                                                                                |
| death_date          | date of death                                                                                                                    |
| depression          | depression code before exposure start: 1= present, 2= absent                                                                     |
| depression_date     | date of first recorded depression: 1= present, 0= absent                                                                         |
| dermatitis          | dermatitis code before exposure start: 1= present, 0= absent                                                                     |
| dermatitis_date     | date of first recorded dermatitis                                                                                                |
| diagnosis_date      | date of first recorded bipolar disorder diagnosis                                                                                |
| diastolic           | diastolic blood pressure before exposure start                                                                                   |
| dob                 | date of birth (midpoint of year of birth)                                                                                        |
| dominant            | dominant mood polarity: 0= unclear, 1= depression, 2= mania                                                                      |
| eGFR_date           | date of renal function blood test before exposure start                                                                          |
| end_reason          | 0= end of follow-up period (31 dec 2018), 1= left practice 2= died,<br>3= started a mood stabiliser, 4= started an antipsychotic |
| ethnicity           | ethnicity (broad groupings): Asian, Black, Mixed, not recorded, other, White                                                     |
| ethnicity_date      | date ethnicity recorded (included if ever recorded)                                                                              |
| ex_time             | total exposure time (exposure_end-exposure_start)                                                                                |
| exposure            | treatment drug; 0=lithium, 1=olanzapine                                                                                          |
| exposure_end        | stop date for exposure to lithium or olanzapine                                                                                  |

---

|                    |                                                                                                      |
|--------------------|------------------------------------------------------------------------------------------------------|
| exposure_start     | start date for exposure to lithium or olanzapine                                                     |
| FH_anxiety         | Family history of anxiety (ever): 1= present, 0= absent                                              |
| FH_anxiety_date    | date family history of anxiety recorded                                                              |
| FH_any             | Family history of any mental health problem (ever): 1= present, 0= absent                            |
| FH_BPD             | Family history of bipolar disorder (ever): 1= present, 0= absent                                     |
| FH_BPD_date        | date family history of bipolar recorded                                                              |
| FH_depression      | Family history of depression (ever): 1= present, 0= absent                                           |
| FH_depression_date | date family history of depression recorded                                                           |
| FH_LD              | Family history of intellectual disability (ever): 1= present, 0= absent                              |
| FH_LD_date         | date family history of intellectual disability recorded                                              |
| FH_NOS             | Family history of mental health problem not otherwise specified (ever):<br>1= present, 0= absent     |
| FH_NOS_date        | date family history of psychiatric problem NOS recorded                                              |
| FH_psychosis       | Family history of psychosis (ever): 1= present, 0= absent                                            |
| FH_psychosis_date  | date family history of psychosis recorded                                                            |
| FH_substance       | Family history of substance misuse (ever): 1= present, 0= absent                                     |
| FH_substance_date  | date family history of substance misuse recorded                                                     |
| FH_suicide         | Family history of suicide (before exposure): 1= present, 0= absent                                   |
| FH_suicide_date    | date family history of suicide recorded                                                              |
| first_date         | date of first symptom of bipolar disorder                                                            |
| first_episode      | First episode presentation: 1= depression, 2= mania                                                  |
| first_reg_date     | date of first registration in primary care practice                                                  |
| HDL                | High density lipoprotein (most recent pre-exposure measure - mmol/L)                                 |
| HDL_date           | date of most recent pre-exposure HDL measurement                                                     |
| hi_ca              | high levels of calcium, ever before exposure (>2.65mmol/L): 1= present, 0= absent                    |
| hi_LDL             | high levels of low-density lipoprotein, ever before exposure (>3mmol/L):<br>1= present, 0= absent    |
| hypertension       | 2 measures of blood pressure >140/90 before baseline: 1= present, 0= absent                          |
| hyperthyroid       | hyperthyroidism diagnosis or TSH<0.1 mU/L: 1= present, 0= absent                                     |
| hyperthyroid_date  | date of first hyperthyroidism                                                                        |
| hypothyroid        | hypothyroidism diagnosis or TSH>10 mU/L: 1= present, 0= absent                                       |
| hypothyroid_date   | date of first hypothyroidism                                                                         |
| incident_script    | first prescription for this patient: 1= likely incident prescription,<br>0=not incident prescription |
| LDL                | Low density lipoprotein (most recent pre-exposure measure - mmol/L)                                  |
| LDL_date           | date of low-density lipoprotein measure                                                              |
| lo_ca              | low levels of calcium, ever before exposure (<2.1mmol/L):<br>1= present, 0= absent                   |
| lo_HDL             | low levels of high-density lipoprotein, ever before exposure (<1mmol/L):<br>1= present, 0= absent    |
| mania              | Mania recorded before exposure start: 1= present, 0= absent                                          |
| mania_date         | date of first manic episode                                                                          |
| mania_type         | type of mania experienced: 0= unclear, 1= hypomania, 2= mania,<br>3= mania + psychosis               |
| migraine           | migraine: 1= present, 0= absent                                                                      |
| migraine date      | date of first migraine                                                                               |

---

|                             |                                                                                                                                                                    |
|-----------------------------|--------------------------------------------------------------------------------------------------------------------------------------------------------------------|
| N_dep_b4                    | number of depression codes before starting lithium or olanzapine                                                                                                   |
| N_man_b4                    | number of mania codes before starting lithium or olanzapine                                                                                                        |
| OCD                         | obsessive compulsive disorder: 1= present, 0=absent                                                                                                                |
| OCD_date                    | date of first obsessive compulsive disorder code                                                                                                                   |
| other_substance_misuse      | substance misuse code (excluding cannabis); 1= present, 0= absent                                                                                                  |
| other_substance_misuse_date | date of first substance misuse code (excluding cannabis)                                                                                                           |
| patid                       | patient id (unique identifier)                                                                                                                                     |
| PD                          | personality disorder: 1= present, 0= absent                                                                                                                        |
| PD_date                     | date of first personality disorder code                                                                                                                            |
| pracid                      | practice id (identifier for primary care practice)                                                                                                                 |
| psych_FH_date               | date psychiatric family history enters (GOLD only)                                                                                                                 |
| psychosis                   | psychotic symptom code before exposure to lithium or olanzapine;<br>1= present, 0= absent                                                                          |
| psychosis_date              | date of first psychosis code                                                                                                                                       |
| relationship                | relationship status: 1= in a relationship, 0= not in a relationship                                                                                                |
| relationship_date           | date relationship status entered                                                                                                                                   |
| responder2                  | 1=individual stays on exposure drug for >2 years,<br>0=individual stays on exposure drug for <2 years                                                              |
| response2_1                 | 1=individual stays on exposure drug for >2 years,<br>0=individual stays on exposure drug for <1 years,<br>. =individual stays on exposure drug for 1-2 years       |
| self_harm                   | self-harm (overdose, cutting or other non-accidental injury); 1= present, 0=absent                                                                                 |
| self_harm_date              | date of self-harm episode (most proximal prior to exposure start)                                                                                                  |
| sex                         | sex; 1=male, 2=female                                                                                                                                              |
| sleep                       | sleep problem: 1= present, 0=absent                                                                                                                                |
| sleep_date                  | date first presentation to GP for sleep problem                                                                                                                    |
| smoke_date                  | date smoking information captured                                                                                                                                  |
| smoker                      | Smoking status at start of lithium or olanzapine treatment;<br>0= never smoker, 1= current smoker, 2= ex-smoker                                                    |
| source                      | Data source: 1=AURUM 2=GOLD                                                                                                                                        |
| stress                      | stress: 1= present, 0= absent                                                                                                                                      |
| stress_date                 | date of first presentation to GP for stress                                                                                                                        |
| suitable                    | suitable for inclusion in analysis;<br>1=individual has >2 years of follow-up after exposure_start,<br>0=individual has <2 years of follow-up after exposure_start |
| symptom_to_diagnosis        | years from first symptom to first recorded diagnosis                                                                                                               |
| symptom_to_exposure         | years from first symptom to first exposure to olanzapine or lithium                                                                                                |
| systolic                    | value of systolic blood pressure (most proximal prior to exposure start)                                                                                           |
| T2DM                        | type II diabetes mellitus: 1= present, 0= absent (diagnostic code or HbA1c>48mmol/mol)                                                                             |
| T2DM_date                   | date of type II diabetes mellitus diagnosis                                                                                                                        |
| transfer_out_date           | date of exit from primary care practice                                                                                                                            |
| TSH                         | value of TSH blood test (mU/L)                                                                                                                                     |
| TSH_date                    | date of TSH blood test (most proximal prior to exposure start)                                                                                                     |
| weight                      | weight group from BMI; 0=underweight (BMI<18.5),<br>1=healthy weight (18.5-25), 2=overweight (25-30), 3=obese (>30)                                                |
| year_exposure               | year exposure started                                                                                                                                              |
| yob                         | year of birth                                                                                                                                                      |
