# Supplementary material for: Predicting maintenance lithium response for bipolar disorder from electronic health records—a retrospective study
Source: PeerJ journal article supplement (doi:10.7717/peerj.17841), 2024-10-14
Supplement: eTable4.pdf [file eTable4.pdf]

| Item                         |        | Recommendation                                                                                                                                                                       | Page No                   |
|------------------------------|--------|--------------------------------------------------------------------------------------------------------------------------------------------------------------------------------------|---------------------------|
| Title and abstract           | 1      | (a) Indicate the study's design with a commonly used term in the title or the abstract                                                                                               | 1                         |
|                              |        | (b) Provide in the abstract an informative and balanced summary of what was done and what was found                                                                                  | 1                         |
| Introduction                 |        |                                                                                                                                                                                      |                           |
| Background/<br>rationale     | 2      | Explain the scientific background and rationale for the investigation being reported                                                                                                 | 1,2                       |
| Objectives                   | 3      | State specific objectives, including any prespecified hypotheses                                                                                                                     | 5-7                       |
| Methods                      |        |                                                                                                                                                                                      |                           |
| Study design                 | 4      | Present key elements of study design early in the paper                                                                                                                              | 2                         |
| Setting                      | 5      | Describe the setting, locations, and relevant dates, including periods of recruitment, exposure, follow-up, and data collection                                                      | 2,4                       |
| Participants                 | 6      | (a) Give the eligibility criteria, and the sources and methods of case ascertainment and control selection. Give the rationale for the choice of cases and controls                  | 2,4,7                     |
|                              |        | (b) For matched studies, give matching criteria and the number of controls per case                                                                                                  | 7                         |
| Variables                    | 7      | Clearly define all outcomes, exposures, predictors, potential confounders, and effect modifiers. Give diagnostic criteria, if applicable                                             | 5,7                       |
| Data sources/<br>measurement | 8<br>* | For each variable of interest, give sources of data and details of methods of assessment (measurement). Describe comparability of assessment methods if there is more than one group | 7,8,<br>Table 2,<br>Suppl |

|                        |             |                                                                                                                                                                                                   |                           |
|------------------------|-------------|---------------------------------------------------------------------------------------------------------------------------------------------------------------------------------------------------|---------------------------|
| Bias                   | 9           | Describe any efforts to address potential sources of bias                                                                                                                                         | 8                         |
| Study size             | 1<br>0      | Explain how the study size was arrived at                                                                                                                                                         | 7                         |
| Quantitative variables | 1<br>1      | Explain how quantitative variables were handled in the analyses. If applicable, describe which groupings were chosen and why                                                                      | 7,<br>Suppl               |
| Statistical methods    | 1<br>2      | (a) Describe all statistical methods, including those used to control for confounding                                                                                                             | 2-5,<br>Suppl             |
|                        |             | (b) Describe any methods used to examine subgroups and interactions                                                                                                                               | 5,8,<br>Fig 2-3,<br>Suppl |
|                        |             | (c) Explain how missing data were addressed                                                                                                                                                       | 4-5                       |
|                        |             | (d) If applicable, explain how matching of cases and controls was addressed                                                                                                                       | Figs                      |
|                        |             | (e) Describe any sensitivity analyses                                                                                                                                                             | Table 2                   |
| Results                |             |                                                                                                                                                                                                   |                           |
| Participants           | 1<br>3<br>* | (a) Report numbers of individuals at each stage of study—eg numbers potentially eligible, examined for eligibility, confirmed eligible, included in the study, completing follow-up, and analysed | Table 1<br>2,7,8          |
|                        |             | (b) Give reasons for non-participation at each stage                                                                                                                                              | 8                         |
|                        |             | (c) Consider use of a flow diagram                                                                                                                                                                | -                         |
| Descriptive data       | 1<br>4<br>* | (a) Give characteristics of study participants (eg demographic, clinical, social) and information on exposures and potential confounders                                                          | 1,4,<br>5,7               |
|                        |             | (b) Indicate number of participants with missing data for each variable of interest                                                                                                               | Zero                      |
| Outcome data           | 1<br>5<br>* | Report numbers in each exposure category, or summary measures of exposure                                                                                                                         | Table 1<br>Suppl          |

|                   |        |                                                                                                                                                                                                              |               |
|-------------------|--------|--------------------------------------------------------------------------------------------------------------------------------------------------------------------------------------------------------------|---------------|
| Main results      | 1      | (a) Give unadjusted estimates and, if applicable, confounder-adjusted estimates and their precision (eg, 95% confidence interval). Make clear which confounders were adjusted for and why they were included | Suppl         |
|                   | 6      |                                                                                                                                                                                                              |               |
|                   |        |                                                                                                                                                                                                              |               |
|                   |        | (b) Report category boundaries when continuous variables were categorized                                                                                                                                    | -             |
|                   |        | (c) If relevant, consider translating estimates of relative risk into absolute risk for a meaningful time period                                                                                             | -             |
| Other analyses    | 1<br>7 | Report other analyses done—eg analyses of subgroups and interactions, and sensitivity analyses                                                                                                               | Suppl         |
| Discussion        |        |                                                                                                                                                                                                              |               |
| Key results       | 1<br>8 | Summarise key results with reference to study objectives                                                                                                                                                     | 7-8           |
| Limitations       | 1<br>9 | Discuss limitations of the study, taking into account sources of potential bias or imprecision. Discuss both direction and magnitude of any potential bias                                                   | 8-9           |
| Interpretation    | 2<br>0 | Give a cautious overall interpretation of results considering objectives, limitations, multiplicity of analyses, results from similar studies, and other relevant evidence                                   | 7-8, Suppl    |
| Generalisability  | 2<br>1 | Discuss the generalisability (external validity) of the study results                                                                                                                                        | 8-9, Suppl    |
| Other information |        |                                                                                                                                                                                                              |               |
| Funding           | 2<br>2 | Give the source of funding and the role of the funders for the present study and, if applicable, for the original study on which the present article is based                                                | 9 (with-held) |
